# Supplementary material for: HCV Spread Kinetics Reveal Varying Contributions of Transmission Modes to Infection Dynamics
Source: MDPI journal article supplement (doi:10.3390/v13071308), 2021-07-06
Supplement: s1 [file s1]

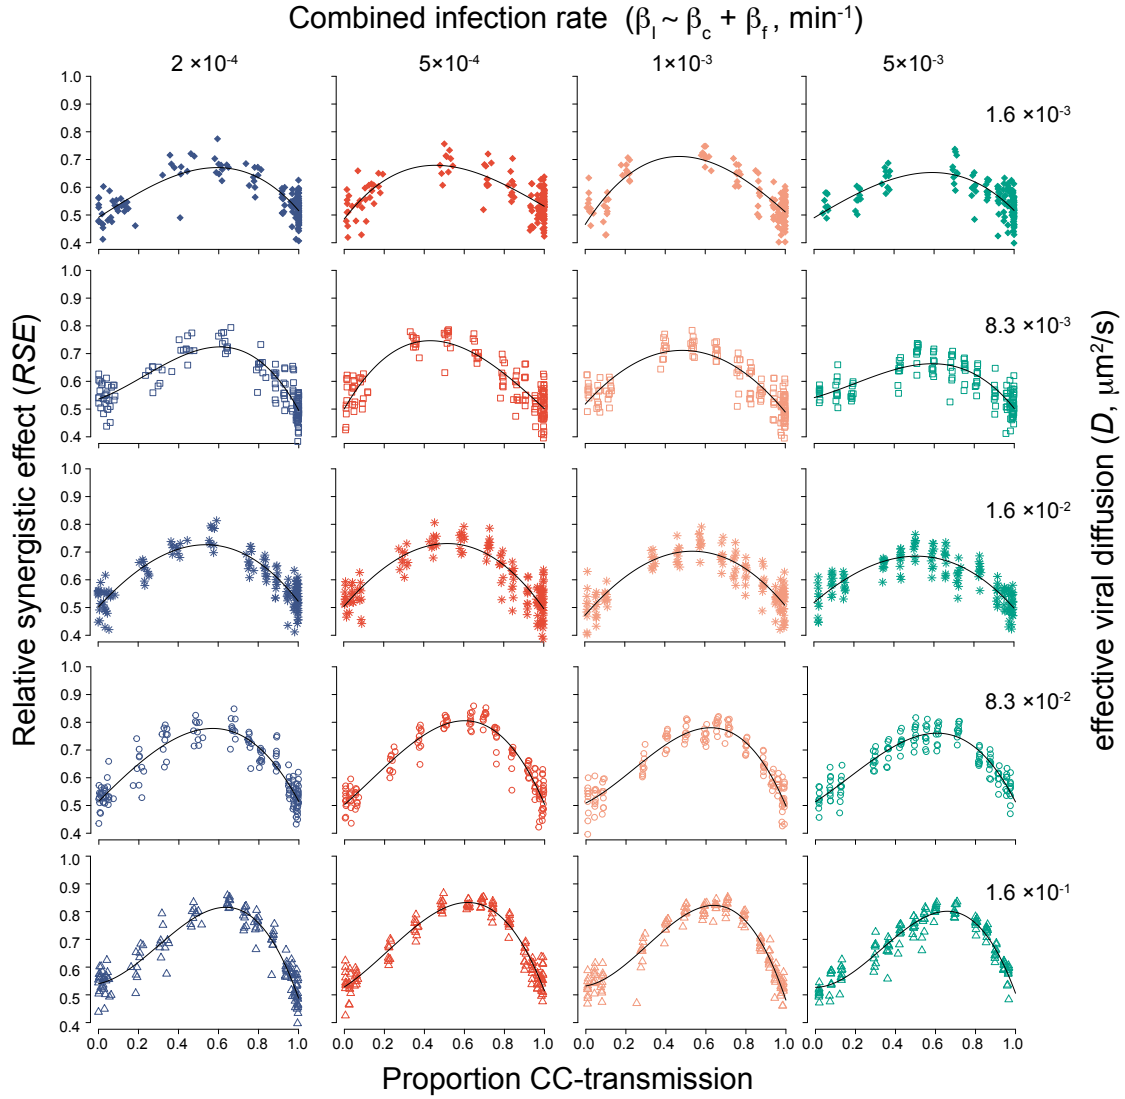

**Figure S7: Advantages of combined modes of viral spread.** Predicted advantage of combined modes of viral spread indicated by the Relative Synergistic Effect ( $RSE$ ) of combined viral spread (Expanded set of combinations compared to main manuscript Figure 5). The  $RSE$  is shown dependent on the proportion of infections by cell-to-cell transmission for different assumptions of the combined occurrence of infection by both transmission modes and the viral diffusion coefficient. Points indicate the maximal  $RSE$  obtained for simulating viral spread in the ABM with different combinations of  $\beta_c$  and  $\beta_f$  making up the combined infection rate  $\beta_I$ . Curves show the result of a polynomial of 3<sup>rd</sup> degree fitted to the individual data.
