# Supplementary material for: HCV Spread Kinetics Reveal Varying Contributions of Transmission Modes to Infection Dynamics
Source: MDPI journal article supplement (doi:10.3390/v13071308), 2021-07-06
Supplement: s1 [file s1]

**Table S1:** Parameter estimates for viral lifecycle kinetics using the mathematical model describing intracellular viral replication and viral export (see *Section 2* for a detailed explanation of the individual parameters). Shown are the best fits with numbers in brackets indicating the 95%-confidence intervals obtained by profile likelihood analysis.

| Parameter | Description                            | Unit                                 | Estimate [ 95%-CI] |
|-----------|----------------------------------------|--------------------------------------|--------------------|
| $R_0$     | Initial intracellular HCV RNA          | RNA cell <sup>-1</sup>               | 80.1 [42.2, 192]   |
| $V_0$     | Initial residual extracellular HCV RNA | $\times 10^3$ RNA cell <sup>-1</sup> | 5.91 [3.66, 10.5]  |
| $\lambda$ | Intracellular RNA production rate      | h <sup>-1</sup>                      | 0.24 [0.19, 0.28]  |
| $\rho$    | Viral export rate                      | $\times 10^{-3}$ h <sup>-1</sup>     | 2.10 [1.24, 3.47]  |
| $R_C$     | Carrying capacity of intracellular RNA | $\times 10^4$ RNA cell <sup>-1</sup> | 7.73 [6.30, 9.76]  |
| $c$       | Viral loss rate                        | $\times 10^{-2}$ h <sup>-1</sup>     | 7.58 [4.88, 11.0]  |
