# Supplementary material for: HCV Spread Kinetics Reveal Varying Contributions of Transmission Modes to Infection Dynamics
Source: MDPI journal article supplement (doi:10.3390/v13071308), 2021-07-06
Supplement: s1 [file s1]

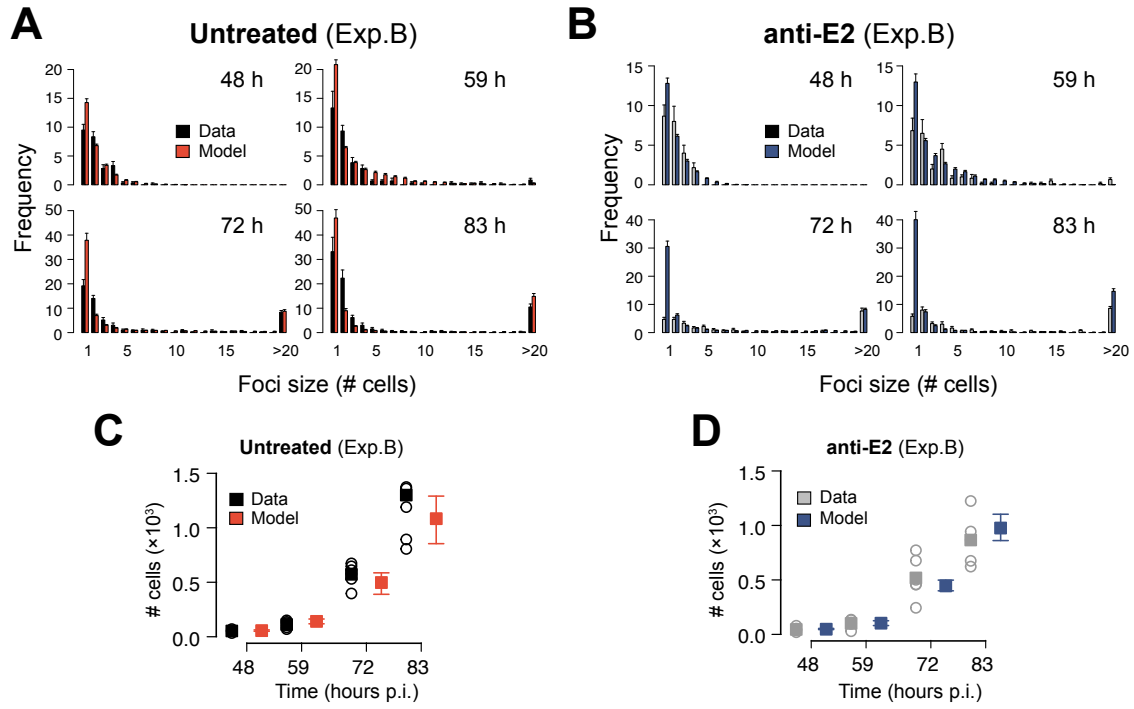

**Figure S4: Model predictions for Exp. B.** (A,B) Measured (black/grey) and predicted (red/blue) focus size distributions for Exp. B without (A) and with (B) administration of anti-E2 at 48, 59, 72 and 83 hours p.i. and calculated across 5 replicates according to the experimental conditions. Predictions are based on an exemplary parameterization of the model as obtained by the fitting procedure. (C,D) Predicted (red/blue) and measured (black/grey) average number of infected cells in untreated (C) and anti-E2 treated (D) wells calculated across 5-6 replicates.
