# Supplementary material for: HCV Spread Kinetics Reveal Varying Contributions of Transmission Modes to Infection Dynamics
Source: Viruses. 2021 Jul 6;13(7):1308. doi: 10.3390/v13071308 (PMC8310333; doi:10.3390/v13071308)
Supplement: Supplementary file 1 [file viruses-13-01308-s001.zip]

Archive with 8 entries (8 files):
- supplemental figures/FigureS1.pdf
- supplemental figures/FigureS2.pdf
- supplemental figures/FigureS3.pdf
- supplemental figures/FigureS4.pdf
- supplemental figures/FigureS5.pdf
- supplemental figures/FigureS6.pdf
- supplemental figures/FigureS7.pdf
- supplemental figures/TableS1.pdf
